# Supplementary material for: The Effect of Open and Closed Oocyte Vitrification Systems on Embryo Development: A Systematic Review and Network Meta-Analysis
Source: MDPI journal article supplement (doi:10.3390/jcm13092651), 2024-04-30
Supplement: s1 [file s1]

## Supplementary Table S1: Search strategy

Database: Pubmed/ MEDLINE

((IVF) OR (ICSI) OR (Vitrification) OR (Cryopreservation)) AND ((Blastocyst formation) OR (Cleavage rate))) (n=5.154)

| Query                                                                                                       | Search Details                                                                                                                                                                                                                                                                                                                                                                                                                                                                                                                                                                                                                                                                                                                                                                                                                                                                                                                                                                                                                                                                                                                                                                                                                                                    | Results |
|-------------------------------------------------------------------------------------------------------------|-------------------------------------------------------------------------------------------------------------------------------------------------------------------------------------------------------------------------------------------------------------------------------------------------------------------------------------------------------------------------------------------------------------------------------------------------------------------------------------------------------------------------------------------------------------------------------------------------------------------------------------------------------------------------------------------------------------------------------------------------------------------------------------------------------------------------------------------------------------------------------------------------------------------------------------------------------------------------------------------------------------------------------------------------------------------------------------------------------------------------------------------------------------------------------------------------------------------------------------------------------------------|---------|
| ((IVF) OR (ICSI) OR (Vitrification) OR (Cryopreservation)) AND ((Blastocyst formation) OR (Cleavage rate))) | ("in vitro fert embryo transf"[Journal] OR "ivf"[All Fields] OR ("sperm injections, intracytoplasmic"[MeSH Terms] OR ("sperm"[All Fields] AND "injections"[All Fields] AND "intracytoplasmic"[All Fields]) OR "intracytoplasmic sperm injections"[All Fields] OR "icsi"[All Fields]) OR ("vitrificated"[All Fields] OR "vitrification"[MeSH Terms] OR "vitrification"[All Fields]) OR ("cryopreservability"[All Fields] OR "cryopreservable"[All Fields] OR "cryopreservant"[All Fields] OR "cryopreservants"[All Fields] OR "cryopreserved"[All Fields] OR "cryopreservation"[MeSH Terms] OR "cryopreservation"[All Fields] OR "cryopreserved"[All Fields] OR "cryopreservations"[All Fields] OR "cryopreservative"[All Fields] OR "cryopreservatives"[All Fields] OR "cryopreserve"[All Fields] OR "cryopreserving"[All Fields])) AND (((("blastocyst"[MeSH Terms] OR "blastocyst"[All Fields] OR "blastocysts"[All Fields]) AND ("formations"[All Fields] OR "metabolism"[MeSH Terms] OR "metabolism"[All Fields] OR "formation"[All Fields])) OR (("cleavaged"[All Fields] OR "cleavages"[All Fields] OR "cytokinesis"[MeSH Terms] OR "cytokinesis"[All Fields] OR "cleavage"[All Fields]) AND ("rehab assist technol eng"[Journal] OR "rate"[All Fields])))) | 5.154   |

Database: Cochrane Library

((IVF) OR (ICSI) OR (Vitrification) OR (Cryopreservation)) AND ((Blastocyst formation) OR (Cleavage rate))) (n=365)

## Supplementary Table S2: Treatment effect and standard error per study for the fertilization rate per oocyte retrieved outcome.

| AUTHOR   | YEAR | Treatment Effect | Standard Error of Treatment Effect | Group 1 | Group 2 | 2PN zygotes group 1 | MII oocytes retrieved group 1 | 2PN zygotes group 2 | MII oocytes retrieved group 2 |
|----------|------|------------------|------------------------------------|---------|---------|---------------------|-------------------------------|---------------------|-------------------------------|
| De Munck | 2016 | 0.050271         | 0.05619                            | OPE N   | CL OSE  | 188                 | 257                           | 176                 | 253                           |

|                    |      |          |          |           |           |      |      |      |      |
|--------------------|------|----------|----------|-----------|-----------|------|------|------|------|
| Rienzi             | 2010 | -0.08408 | 0.064253 | OPE<br>N  | FRE<br>SH | 95   | 124  | 100  | 120  |
| Porcu              | 2021 | 0.062181 | 0.049353 | OPE<br>N  | CL<br>OSE | 445  | 1095 | 561  | 1469 |
| Gullo              | 2020 | -0.01934 | 0.028391 | OPE<br>N  | CL<br>OSE | 594  | 790  | 601  | 784  |
| Cobo               | 2010 | -0.06521 | 0.015919 | OPE<br>N  | FRE<br>SH | 2256 | 3286 | 2334 | 3185 |
| Sole               | 2013 | -0.18361 | 0.026667 | OPE<br>N  | FRE<br>SH | 665  | 990  | 887  | 1099 |
| Pujol              | 2019 | 0.138261 | 0.054782 | OPE<br>N  | CL<br>OSE | 294  | 474  | 269  | 498  |
| Buderat<br>ska     | 2020 | 0.013032 | 0.048061 | OPE<br>N  | FRE<br>SH | 102  | 121  | 218  | 262  |
| De<br>Ghesell<br>e | 2020 | -0.25328 | 0.067449 | OPE<br>N  | FRE<br>SH | 160  | 287  | 158  | 220  |
| Cobo               | 2008 | -0.10464 | 0.050083 | OPE<br>N  | FRE<br>SH | 171  | 231  | 180  | 219  |
| Paffoni<br>a       | 2011 | -0.56498 | 0.085429 | OPE<br>N  | FRE<br>SH | 116  | 268  | 99   | 130  |
| Paffoni<br>b       | 2011 | -0.85678 | 0.098435 | CL<br>OSE | FRE<br>SH | 87   | 261  | 106  | 135  |
| Papathe<br>odorou  | 2013 | -0.02395 | 0.039888 | OPE<br>N  | CL<br>OSE | 406  | 608  | 409  | 598  |
| Garcia             | 2011 | -0.258   | 0.043703 | CL<br>OSE | FRE<br>SH | 191  | 283  | 608  | 696  |
| Trokoud<br>es      | 2011 | -0.1161  | 0.045114 | OPE<br>N  | FRE<br>SH | 162  | 210  | 214  | 247  |
| Chamay<br>ou       | 2017 | -0.10303 | 0.039531 | OPE<br>N  | FRE<br>SH | 411  | 615  | 343  | 463  |
| Papathe<br>odorou  | 2016 | -0.06959 | 0.023786 | CL<br>OSE | FRE<br>SH | 744  | 984  | 796  | 982  |
| Gallard<br>o       | 2016 | 0.004454 | 0.097086 | CL<br>OSE | FRE<br>SH | 51   | 68   | 56   | 75   |
| Parmegi<br>ani     | 2011 | -0.32708 | 0.067038 | OPE<br>N  | FRE<br>SH | 107  | 168  | 106  | 120  |
| Forman             | 2012 | -0.35239 | 0.048003 | OPE<br>N  | FRE<br>SH | 187  | 294  | 266  | 294  |
| Chang              | 2013 | -0.11778 | 0.065743 | OPE<br>N  | FRE<br>SH | 124  | 186  | 153  | 204  |
| Antinori           | 2007 | -0.04516 | 0.017189 | OPE<br>N  | FRE<br>SH | 305  | 330  | 702  | 726  |
| Montjea<br>n D     | 2015 | -0.11352 | 0.045973 | OPE<br>N  | FRE<br>SH | 376  | 648  | 351  | 540  |
| Ubaldi             | 2010 | -0.3733  | 0.033769 | OPE<br>N  | FRE<br>SH | 462  | 770  | 468  | 537  |

Supplementary Table S3: Treatment effect and standard error per study for the cleavage rate per oocyte retrieved outcome.

| AUTHOR | YEAR | Treatment Effect | Standard Error of Treatment Effect | Group 1 | Group 2 | Cleaved embryos group 1 | MII oocytes retrieved group 1 | Cleaved embryos group 2 | MII oocytes retrieved group 1 |
|--------|------|------------------|------------------------------------|---------|---------|-------------------------|-------------------------------|-------------------------|-------------------------------|
|--------|------|------------------|------------------------------------|---------|---------|-------------------------|-------------------------------|-------------------------|-------------------------------|

|                       |      |          |          |       |       |      |      |      |      |
|-----------------------|------|----------|----------|-------|-------|------|------|------|------|
| De Munck              | 2016 | 0.112489 | 0.090676 | OPEN  | CLOSE | 133  | 257  | 117  | 253  |
| Rienzi                | 2010 | -0.10536 | 0.065991 | OPEN  | FRESH | 93   | 124  | 100  | 120  |
| Porcu                 | 2021 | 0.059798 | 0.053498 | OPEN  | CLOSE | 402  | 1095 | 508  | 1469 |
| Gullo                 | 2020 | -0.01659 | 0.032345 | OPEN  | CLOSE | 555  | 790  | 560  | 784  |
| Cobo                  | 2010 | -0.08262 | 0.020507 | OPEN  | FRESH | 1877 | 3286 | 1976 | 3185 |
| Sole                  | 2013 | -0.22317 | 0.043243 | OPEN  | FRESH | 454  | 990  | 630  | 1099 |
| Pujol                 | 2019 | 0.049393 | 0.107844 | OPEN  | CLOSE | 127  | 474  | 127  | 498  |
| Buderat<br>ska        | 2020 | 0.02009  | 0.06531  | OPEN  | FRESH | 90   | 121  | 191  | 262  |
| De<br>Ghesell<br>e    | 2020 | -0.25328 | 0.067449 | OPEN  | FRESH | 160  | 287  | 158  | 220  |
| Cobo                  | 2008 | -0.22898 | 0.076264 | OPEN  | FRESH | 125  | 231  | 149  | 219  |
| Paffoni<br>a          | 2011 | -0.57966 | 0.088398 | OPEN  | FRESH | 112  | 268  | 97   | 130  |
| Paffoni<br>b          | 2011 | -1.04026 | 0.114695 | CLOSE | FRESH | 69   | 261  | 101  | 135  |
| Papath<br>eodoro<br>u | 2013 | -0.03493 | 0.043885 | OPEN  | CLOSE | 378  | 608  | 385  | 598  |
| Garcia                | 2011 | -0.2754  | 0.046285 | CLOSE | FRESH | 184  | 283  | 596  | 696  |
| Trokou<br>des         | 2011 | -0.1173  | 0.050191 | OPEN  | FRESH | 155  | 210  | 205  | 247  |
| Papath<br>eodoro<br>u | 2016 | -0.06775 | 0.027635 | CLOSE | FRESH | 692  | 984  | 739  | 982  |
| Gallard<br>o          | 2016 | 0.030539 | 0.130214 | CLOSE | FRESH | 43   | 68   | 46   | 75   |
| Parmeg<br>iani        | 2011 | -0.34954 | 0.1089   | OPEN  | FRESH | 76   | 168  | 77   | 120  |
| Forman                | 2012 | -0.44015 | 0.053549 | OPEN  | FRESH | 170  | 294  | 264  | 294  |
| Antinori              | 2007 | -0.05399 | 0.021023 | OPEN  | FRESH | 295  | 330  | 685  | 726  |
| Montje<br>an D        | 2015 | -0.35042 | 0.05348  | OPEN  | FRESH | 295  | 648  | 349  | 540  |

Supplementary Table S4: Treatment effect and standard error per study for the cleavage rate per 2PN zygote outcome.

| AUTHOR            | YE<br>AR | Treatment<br>Effect | Standard Error of<br>Treatment Effect | Grou<br>p 1 | Grou<br>p 2 | Cleaved<br>embryos group<br>1 | 2PN zygotes<br>group 1 | Cleaved<br>embryos group<br>2 | 2PN zygotes<br>group 2 |
|-------------------|----------|---------------------|---------------------------------------|-------------|-------------|-------------------------------|------------------------|-------------------------------|------------------------|
| De<br>Munck       | 20<br>16 | 0.062217            | 0.071168                              | OPE<br>N    | CLO<br>SE   | 133                           | 188                    | 117                           | 176                    |
| Rienzi            | 20<br>10 | -0.02116            | 0.014966                              | OPE<br>N    | FRE<br>SH   | 93                            | 95                     | 100                           | 100                    |
| Porcu             | 20<br>21 | -0.00238            | 0.020648                              | OPE<br>N    | CLO<br>SE   | 402                           | 445                    | 508                           | 561                    |
| Gullo             | 20<br>20 | 0.002747            | 0.015496                              | OPE<br>N    | CLO<br>SE   | 555                           | 594                    | 560                           | 601                    |
| Cobo              | 20<br>10 | -0.01741            | 0.012928                              | OPE<br>N    | FRE<br>SH   | 1877                          | 2256                   | 1976                          | 2334                   |
| Sole              | 20<br>13 | -0.03956            | 0.034041                              | OPE<br>N    | FRE<br>SH   | 454                           | 665                    | 630                           | 887                    |
| Pujol             | 20<br>19 | -0.08887            | 0.092893                              | OPE<br>N    | CLO<br>SE   | 127                           | 294                    | 127                           | 269                    |
| Buderats<br>ka    | 20<br>20 | 0.007058            | 0.044223                              | OPE<br>N    | FRE<br>SH   | 90                            | 102                    | 191                           | 218                    |
| De<br>Gheselle    | 20<br>20 | 0                   | 0.00628                               | OPE<br>N    | FRE<br>SH   | 160                           | 160                    | 158                           | 158                    |
| Cobo              | 20<br>08 | -0.12434            | 0.057514                              | OPE<br>N    | FRE<br>SH   | 125                           | 171                    | 149                           | 180                    |
| Paffoni a         | 20<br>11 | -0.01468            | 0.022719                              | OPE<br>N    | FRE<br>SH   | 112                           | 116                    | 97                            | 99                     |
| Paffoni b         | 20<br>11 | -0.18348            | 0.058869                              | CLO<br>SE   | FRE<br>SH   | 69                            | 87                     | 101                           | 106                    |
| Papatheo<br>dorou | 20<br>13 | -0.01099            | 0.018299                              | OPE<br>N    | CLO<br>SE   | 378                           | 406                    | 385                           | 409                    |
| Garcia            | 20<br>11 | -0.0174             | 0.015241                              | CLO<br>SE   | FRE<br>SH   | 184                           | 191                    | 596                           | 608                    |
| Trokoude<br>s     | 20<br>11 | -0.00121            | 0.021998                              | OPE<br>N    | FRE<br>SH   | 155                           | 162                    | 205                           | 214                    |
| Papatheo<br>dorou | 20<br>16 | 0.001846            | 0.014068                              | CLO<br>SE   | FRE<br>SH   | 692                           | 744                    | 739                           | 796                    |
| Gallardo          | 20<br>16 | 0.026085            | 0.086775                              | CLO<br>SE   | FRE<br>SH   | 43                            | 51                     | 46                            | 56                     |
| Parmegia<br>ni    | 20<br>11 | -0.02246            | 0.08582                               | OPE<br>N    | FRE<br>SH   | 76                            | 107                    | 77                            | 106                    |
| Forman            | 20<br>12 | -0.08776            | 0.023733                              | OPE<br>N    | FRE<br>SH   | 170                           | 187                    | 264                           | 266                    |
| Antinori          | 20<br>07 | -0.00882            | 0.012103                              | OPE<br>N    | FRE<br>SH   | 295                           | 305                    | 685                           | 702                    |
| Montjean<br>D     | 20<br>15 | -0.2369             | 0.027324                              | OPE<br>N    | FRE<br>SH   | 295                           | 376                    | 349                           | 351                    |

Supplementary Table S5: Treatment effect and standard error per study for the blastocyst formation rate per oocyte retrieved outcome.

| AUTHOR         | YE<br>AR | Treatmen<br>t Effect | Standard Error of<br>Treatment Effect | Gro<br>up 1 | Grou<br>p 2 | Blastocysts<br>group 1 | MII oocytes<br>retrieved group 1 | Blastocysts<br>group 2 | MII oocytes<br>retrieved group 2 |
|----------------|----------|----------------------|---------------------------------------|-------------|-------------|------------------------|----------------------------------|------------------------|----------------------------------|
| Gullo          | 20<br>20 | -0.05429             | 0.060687                              | OPE<br>N    | CLO<br>SE   | 314                    | 790                              | 329                    | 784                              |
| Buderats<br>ka | 20<br>20 | -0.11199             | 0.099977                              | OPE<br>N    | FRE<br>SH   | 64                     | 121                              | 155                    | 262                              |
| De<br>Gheselle | 20<br>20 | -0.53779             | 0.139642                              | OPE<br>N    | FRE<br>SH   | 64                     | 287                              | 84                     | 220                              |
| Garcia         | 20<br>11 | -0.35105             | 0.106353                              | CLO<br>SE   | FRE<br>SH   | 79                     | 283                              | 276                    | 696                              |

|               |      |          |          |           |           |     |     |     |     |
|---------------|------|----------|----------|-----------|-----------|-----|-----|-----|-----|
| Chamayou      | 2017 | -0.26192 | 0.104249 | OPE<br>N  | FRE<br>SH | 138 | 615 | 135 | 463 |
| Papatheodorou | 2016 | -0.09734 | 0.048003 | CLO<br>SE | FRE<br>SH | 440 | 984 | 484 | 982 |
| Forman        | 2012 | -0.73089 | 0.126449 | OPE<br>N  | FRE<br>SH | 65  | 294 | 135 | 294 |
| Chang         | 2013 | -0.00448 | 0.148511 | OPE<br>N  | FRE<br>SH | 59  | 186 | 65  | 204 |
| Montjean D    | 2015 | -0.86599 | 0.158103 | OPE<br>N  | FRE<br>SH | 53  | 648 | 105 | 540 |

Supplementary Table S6: Treatment effect and standard error per study for the blastocyst formation rate per 2PN zygote outcome.

| AUTHOR        | YEAR | Treatment Effect | Standard Error of Treatment Effect | Group 1   | Group 2   | Blastocysts group 1 | 2PN zygotes group 1 | Blastocysts group 2 | 2PN zygotes group 2 |
|---------------|------|------------------|------------------------------------|-----------|-----------|---------------------|---------------------|---------------------|---------------------|
| Gullo         | 2020 | -0.03495         | 0.053636                           | OPE<br>N  | CLO<br>SE | 314                 | 594                 | 329                 | 601                 |
| Buderatska    | 2020 | -0.12502         | 0.087667                           | OPE<br>N  | FRE<br>SH | 64                  | 102                 | 155                 | 218                 |
| De Gheselle   | 2020 | -0.28451         | 0.122273                           | OPE<br>N  | FRE<br>SH | 64                  | 160                 | 84                  | 158                 |
| Garcia        | 2011 | -0.09305         | 0.096959                           | CLO<br>SE | FRE<br>SH | 79                  | 191                 | 276                 | 608                 |
| Chamayou      | 2017 | -0.15888         | 0.096464                           | OPE<br>N  | FRE<br>SH | 138                 | 411                 | 135                 | 343                 |
| Papatheodorou | 2016 | -0.02775         | 0.041695                           | CLO<br>SE | FRE<br>SH | 440                 | 744                 | 484                 | 796                 |
| Forman        | 2012 | -0.3785          | 0.116983                           | OPE<br>N  | FRE<br>SH | 65                  | 187                 | 135                 | 266                 |
| Chang         | 2013 | 0.113307         | 0.133166                           | OPE<br>N  | FRE<br>SH | 59                  | 124                 | 65                  | 153                 |
| Montjean D    | 2015 | -0.75247         | 0.151272                           | OPE<br>N  | FRE<br>SH | 53                  | 376                 | 105                 | 351                 |

Supplementary Table S7: Treatment effect and standard error per study for the clinical pregnancy rate outcome.

| AUTHOR   | YEAR | Treatment Effect | Standard Error of Treatment Effect | Group 1 | Group 2 | Clinical Pregnancies group 1 | Patients group 1 | Clinical Pregnancies group 2 | Patients group 2 |
|----------|------|------------------|------------------------------------|---------|---------|------------------------------|------------------|------------------------------|------------------|
| De Munck | 2016 | 0.182322         | 0.499019                           | OPEN    | CLOSE   | 6                            | 17               | 5                            | 17               |
| Rienzi   | 2020 | -0.14953         | 0.2283                             | OPEN    | FRESH   | 15                           | 40               | 54                           | 124              |

|                       |                  |                  |          |               |               |     |     |     |     |
|-----------------------|------------------|------------------|----------|---------------|---------------|-----|-----|-----|-----|
|                       | 1<br>0           |                  |          |               |               |     |     |     |     |
| Porcu                 | 2<br>0<br>2<br>1 | -<br>0.1871<br>4 | 0.133256 | OP<br>EN      | CL<br>OS<br>E | 79  | 369 | 95  | 368 |
| Gullo                 | 2<br>0<br>2<br>0 | -<br>0.0434<br>9 | 0.149821 | OP<br>EN      | CL<br>OS<br>E | 45  | 95  | 47  | 95  |
| Cobo                  | 2<br>0<br>1<br>0 | 0.0273<br>99     | 0.083872 | OP<br>EN      | FR<br>ES<br>H | 148 | 300 | 144 | 300 |
| Sole                  | 2<br>0<br>1<br>3 | 0.1201<br>44     | 0.141218 | OP<br>EN      | FR<br>ES<br>H | 53  | 99  | 47  | 99  |
| Pujol                 | 2<br>0<br>1<br>9 | 0.2231<br>44     | 0.25     | OP<br>EN      | CL<br>OS<br>E | 20  | 40  | 16  | 40  |
| Papath<br>eodoro<br>u | 2<br>0<br>1<br>3 | -<br>0.2513<br>1 | 0.24081  | OP<br>EN      | CL<br>OS<br>E | 21  | 75  | 27  | 75  |
| Garcia                | 2<br>0<br>1<br>1 | 0.0289<br>88     | 0.161401 | CL<br>OS<br>E | FR<br>ES<br>H | 21  | 34  | 51  | 85  |
| Trokou<br>des         | 2<br>0<br>1<br>1 | 0.1300<br>53     | 0.218705 | OP<br>EN      | FR<br>ES<br>H | 20  | 36  | 20  | 41  |
| Papath<br>eodoro<br>u | 2<br>0<br>1<br>6 | 0.0571<br>58     | 0.128013 | CL<br>OS<br>E | FR<br>ES<br>H | 54  | 92  | 51  | 92  |
